# Supplementary material
Source: PubMed Central journal article supplement (PMC6713594)
Supplement: NIHMS1532775-supplement-2.pdf [file NIHMS1532775-supplement-2.pdf]

Fig. 1b

ANOVA, Tukey-Kramer *post hoc* tests

| Comparison                          | d.f.    | <i>F</i> -statistic | <i>P</i> -value | <i>P</i> -value |
|-------------------------------------|---------|---------------------|-----------------|-----------------|
| zf <sub>ZF</sub> – lf <sub>LF</sub> | (4, 56) | 3.30                | 0.017           | 0.99            |
| zf <sub>ZF</sub> – zf <sub>BF</sub> |         |                     |                 | 0.16            |
| zf <sub>BF</sub> – bf <sub>BF</sub> |         |                     |                 | 0.92            |
| bf <sub>BF</sub> – lf <sub>BF</sub> |         |                     |                 | 0.080           |
| lf <sub>BF</sub> – lf <sub>LF</sub> |         |                     |                 | 0.95            |
| zf <sub>BF</sub> – lf <sub>BF</sub> |         |                     |                 | 0.065           |

Fig. 1c

Nested ANOVAs: syllable copy similarity ~ **bird group** + bird identity(group)

| Comparison                          | d.f.    | <i>F</i> -statistic | <i>P</i> -value      |
|-------------------------------------|---------|---------------------|----------------------|
| zf <sub>ZF</sub> – lf <sub>LF</sub> | (1, 35) | 6.30                | 0.016                |
| zf <sub>BF</sub> – lf <sub>BF</sub> | (1, 19) | 4.64                | 0.043                |
| zf <sub>ZF</sub> – zf <sub>BF</sub> | (1, 34) | 60.06               | $1.4 \times 10^{-8}$ |
| zf <sub>BF</sub> – bf <sub>BF</sub> | (1, 12) | 10.60               | 0.0073               |
| bf <sub>BF</sub> – lf <sub>BF</sub> | (1, 11) | 1.54                | 0.24                 |
| lf <sub>BF</sub> – lf <sub>LF</sub> | (1, 20) | 1.18                | 0.29                 |

Fig. 2d

Repeated-measures ANOVAs: diff. in spike rate (ZF – LF) ~ bird identity

| Comparison |                  | d.f.     | <i>F</i> -statistic | <i>P</i> -value       |
|------------|------------------|----------|---------------------|-----------------------|
| int.       | zf <sub>ZF</sub> | (1, 145) | 164.43              | $1.2 \times 10^{-25}$ |
|            | lf <sub>LF</sub> | (1, 165) | 25.64               | $1.1 \times 10^{-6}$  |
| sup.       | zf <sub>ZF</sub> | (1, 176) | 63.1                | $2.3 \times 10^{-13}$ |
|            | lf <sub>LF</sub> | (1, 51)  | 1.45                | 0.23                  |
| deep       | zf <sub>ZF</sub> | (1, 278) | 112.05              | $3.2 \times 10^{-22}$ |
|            | lf <sub>LF</sub> | (1, 234) | 10.63               | 0.0013                |
| sec.       | zf <sub>ZF</sub> | (1, 214) | 13.58               | $2.9 \times 10^{-4}$  |
|            | lf <sub>LF</sub> | (1, 196) | 46.91               | $9.4 \times 10^{-11}$ |

Nested ANOVAs: selectivity ~ **bird group** + bird identity(group)

| Comparison |                                     | d.f.   | <i>F</i> -statistic | <i>P</i> -value      |
|------------|-------------------------------------|--------|---------------------|----------------------|
| int.       | zf <sub>ZF</sub> – lf <sub>LF</sub> | (1, 4) | 21.58               | 0.0094               |
| sup.       | zf <sub>ZF</sub> – lf <sub>LF</sub> | (1, 3) | 24.15               | 0.0010               |
| deep       | zf <sub>ZF</sub> – lf <sub>LF</sub> | (1, 4) | 18.82               | 0.012                |
| sec.       | zf <sub>ZF</sub> – lf <sub>LF</sub> | (1, 4) | 59.13               | $9.0 \times 10^{-4}$ |

Fig. 3a

Repeated-measures ANOVAs: diff. in spike rate (ZF – BF) ~ bird identity

| Comparison |                  | d.f.     | <i>F</i> -statistic | <i>P</i> -value       |
|------------|------------------|----------|---------------------|-----------------------|
| int.       | zf <sub>ZF</sub> | (1, 146) | 15.45               | $1.3 \times 10^{-4}$  |
|            | zf <sub>BF</sub> | (1, 70)  | 8.68                | 0.0044                |
| sup.       | zf <sub>ZF</sub> | (1, 178) | 25.01               | $1.4 \times 10^{-6}$  |
|            | zf <sub>BF</sub> | (1, 77)  | 2.76                | 0.10                  |
| deep       | zf <sub>ZF</sub> | (1, 267) | 116.45              | $9.1 \times 10^{-23}$ |
|            | zf <sub>BF</sub> | (1, 133) | 9.17                | 0.0030                |
| sec.       | zf <sub>ZF</sub> | (1, 194) | 18.50               | $2.7 \times 10^{-5}$  |
|            | zf <sub>BF</sub> | (1, 247) | 0.21                | 0.64                  |

Nested ANOVAs: selectivity ~ **bird group** + bird identity(group)

| Comparison |                                     | d.f.   | <i>F</i> -statistic | <i>P</i> -value |
|------------|-------------------------------------|--------|---------------------|-----------------|
| int.       | zf <sub>ZF</sub> – zf <sub>BF</sub> | (1, 4) | 1.19                | 0.32            |
| sup.       | zf <sub>ZF</sub> – zf <sub>BF</sub> | (1, 4) | 0.02                | 0.89            |
| deep       | zf <sub>ZF</sub> – zf <sub>BF</sub> | (1, 4) | 10.24               | 0.016           |
| sec.       | zf <sub>ZF</sub> – zf <sub>BF</sub> | (1, 4) | 4.80                | 0.065           |

Fig. 3b

Two-sided, paired *t*-tests: number of segments (zf<sub>ZF</sub>>zf<sub>BF</sub> vs. zf<sub>BF</sub>>zf<sub>ZF</sub>)

| Comparison |    | d.f. | <i>t</i> -statistic | <i>P</i> -value |
|------------|----|------|---------------------|-----------------|
| deep       | ZF | 4    | 3.45                | 0.026           |
|            | BF | 4    | -3.94               | 0.017           |

Fig. 3c

Repeated-measures ANOVAs: diff. in spike rate (LF – BF) ~ bird identity

| Comparison |                  | d.f.     | <i>F</i> -statistic | <i>P</i> -value       |
|------------|------------------|----------|---------------------|-----------------------|
| int.       | lf <sub>LF</sub> | (1, 161) | 16.03               | $9.5 \times 10^{-5}$  |
|            | lf <sub>BF</sub> | (1, 130) | 45.90               | $3.9 \times 10^{-10}$ |
| sup.       | lf <sub>LF</sub> | (1, 46)  | 0.03                | 0.85                  |
|            | lf <sub>BF</sub> | (1, 20)  | 1.85                | 0.19                  |
| deep       | lf <sub>LF</sub> | (1, 221) | 15.85               | $9.3 \times 10^{-5}$  |
|            | lf <sub>BF</sub> | (1, 72)  | 2.18                | 0.14                  |
| sec.       | lf <sub>LF</sub> | (1, 205) | 32.35               | $4.4 \times 10^{-8}$  |
|            | lf <sub>BF</sub> | (1, 187) | 3.88                | 0.050                 |

Nested ANOVAs: selectivity ~ **bird group** + bird identity(group)

| Comparison |                                     | d.f.   | <i>F</i> -statistic | <i>P</i> -value |
|------------|-------------------------------------|--------|---------------------|-----------------|
| int.       | lf <sub>LF</sub> – lf <sub>BF</sub> | (1, 4) | 2.69                | 0.17            |
| sup.       | lf <sub>LF</sub> – lf <sub>BF</sub> | (1, 3) | 5.38                | 0.023           |
| deep       | lf <sub>LF</sub> – lf <sub>BF</sub> | (1, 4) | 9.17                | 0.027           |
| sec.       | lf <sub>LF</sub> – lf <sub>BF</sub> | (1, 4) | 9.51                | 0.036           |

Fig. 3d

Two-sided, paired *t*-tests: number of segments (lf<sub>LF</sub>>lf<sub>BF</sub> vs. lf<sub>BF</sub>>lf<sub>LF</sub>)

| Comparison |    | d.f. | <i>t</i> -statistic | <i>P</i> -value      |
|------------|----|------|---------------------|----------------------|
| deep       | LF | 4    | 17.10               | $6.9 \times 10^{-5}$ |
|            | BF | 4    | -1.12               | 0.32                 |

Fig. 4d

Pearson correlations: one-sided  $P$ -values from randomized permutations

| Comparison |                                     | d.f. | $t$ -statistic | $r$   | $P$ -value |
|------------|-------------------------------------|------|----------------|-------|------------|
| int.       | zf <sub>ZF</sub> – lf <sub>LF</sub> | 108  | -1.45          | -0.14 | 0.93       |
|            | zf <sub>BF</sub> – lf <sub>BF</sub> | 108  | 8.62           | 0.64  | <0.001     |
|            | zf <sub>ZF</sub> – zf <sub>BF</sub> | 108  | 3.52           | 0.32  | 0.001      |
|            | lf <sub>LF</sub> – lf <sub>BF</sub> | 108  | 6.34           | 0.52  | <0.001     |
| deep       | zf <sub>ZF</sub> – lf <sub>LF</sub> | 108  | 5.84           | 0.49  | <0.001     |
|            | zf <sub>BF</sub> – lf <sub>BF</sub> | 108  | 25.22          | 0.92  | <0.001     |
|            | zf <sub>ZF</sub> – zf <sub>BF</sub> | 108  | 14.54          | 0.81  | <0.001     |
|            | lf <sub>LF</sub> – lf <sub>BF</sub> | 108  | 9.03           | 0.66  | <0.001     |

Fig. 4e

Repeated-measures ANOVAs: diff. in spike rate (In – Out) ~ bird identity

| Comparison |                  | d.f.     | $F$ -statistic | $P$ -value            |
|------------|------------------|----------|----------------|-----------------------|
| int.       | zf <sub>ZF</sub> | (1, 164) | 0.03           | 0.86                  |
|            | zf <sub>BF</sub> | (1, 86)  | 12.14          | $7.8 \times 10^{-4}$  |
|            | lf <sub>LF</sub> | (1, 189) | 3.31           | 0.070                 |
|            | lf <sub>BF</sub> | (1, 159) | 0.04           | 0.84                  |
| deep       | zf <sub>ZF</sub> | (1, 293) | 96.86          | $6.3 \times 10^{-20}$ |
|            | zf <sub>BF</sub> | (1, 183) | 9.05           | 0.0030                |
|            | lf <sub>LF</sub> | (1, 252) | 92.98          | $6.3 \times 10^{-19}$ |
|            | lf <sub>BF</sub> | (1, 108) | 22.08          | $7.7 \times 10^{-6}$  |

Fig. 5d, *top*ANOVA: SMFs evoking different pPSTHs ~ **bird group** + stimulus species

| Comparison |                                     | d.f.   | <i>F</i> -statistic | <i>P</i> -value       |
|------------|-------------------------------------|--------|---------------------|-----------------------|
| int.       | zf <sub>ZF</sub> – lf <sub>LF</sub> | (1, 1) | 72.69               | $7.0 \times 10^{-16}$ |

Nested ANOVAs: spike rate ~ **bird group** + bird identity(group)

| Comparison |             | d.f.   | <i>F</i> -statistic | <i>P</i> -value |
|------------|-------------|--------|---------------------|-----------------|
| int.       | 1.8 cyc/kHz | (1, 4) | 0.00                | 1.00            |
|            | 1.6         | (1, 4) | 0.22                | 0.66            |
|            | 1.4         | (1, 4) | 0.25                | 0.64            |
|            | 1.2         | (1, 4) | 0.16                | 0.71            |
|            | 1.0         | (1, 4) | 0.08                | 0.79            |
|            | 0.8         | (1, 4) | 0.21                | 0.67            |
|            | 0.6         | (1, 4) | 3.54                | 0.13            |
|            | 0.4         | (1, 4) | 3.52                | 0.13            |
|            | 0.2         | (1, 4) | 0.03                | 0.87            |
|            | 0           | (1, 4) | 2.59                | 0.18            |

Fig. 5d, *bottom*ANOVA: SMFs evoking different pPSTHs ~ **bird group** + stimulus species

| Comparison |                                     | d.f.   | <i>F</i> -statistic | <i>P</i> -value       |
|------------|-------------------------------------|--------|---------------------|-----------------------|
| deep       | zf <sub>ZF</sub> – lf <sub>LF</sub> | (1, 1) | 41.24               | $5.6 \times 10^{-10}$ |

Nested ANOVAs: spike rate ~ **bird group** + bird identity(group)

| Comparison |             | d.f.   | <i>F</i> -statistic | <i>P</i> -value      |
|------------|-------------|--------|---------------------|----------------------|
| deep       | 1.8 cyc/kHz | (1, 4) | 46.08               | $9.7 \times 10^{-5}$ |
|            | 1.6         | (1, 4) | 31.12               | $5.1 \times 10^{-4}$ |
|            | 1.4         | (1, 4) | 21.10               | 0.0042               |
|            | 1.2         | (1, 4) | 12.33               | 0.0097               |
|            | 1.0         | (1, 4) | 0.11                | 0.75                 |
|            | 0.8         | (1, 4) | 33.33               | $7.5 \times 10^{-4}$ |
|            | 0.6         | (1, 4) | 54.94               | $2.6 \times 10^{-4}$ |
|            | 0.4         | (1, 4) | 17.13               | 0.0084               |
|            | 0.2         | (1, 4) | 3.10                | 0.11                 |
|            | 0           | (1, 4) | 4.27                | 0.078                |

Fig. 5e, top

ANOVA: SMFs evoking different pPSTHs ~ **bird group** + stimulus species

| Comparison |                   | d.f.   | <i>F</i> -statistic | <i>P</i> -value      |
|------------|-------------------|--------|---------------------|----------------------|
| int.       | $z_{ZF} - z_{BF}$ | (1, 1) | 12.07               | $6.9 \times 10^{-4}$ |

Nested ANOVAs: spike rate ~ **bird group** + bird identity(group)

| Comparison |             | d.f.   | <i>t</i> -statistic | <i>P</i> -value |
|------------|-------------|--------|---------------------|-----------------|
| int.       | 1.8 cyc/kHz | (1, 4) | 5.81                | 0.047           |
|            | 1.6         | (1, 4) | 5.18                | 0.067           |
|            | 1.4         | (1, 4) | 1.71                | 0.25            |
|            | 1.2         | (1, 4) | 0.15                | 0.71            |
|            | 1.0         | (1, 4) | 0.08                | 0.79            |
|            | 0.8         | (1, 4) | 0.13                | 0.74            |
|            | 0.6         | (1, 4) | 0.07                | 0.80            |
|            | 0.4         | (1, 4) | 0.36                | 0.58            |
|            | 0.2         | (1, 4) | 0.60                | 0.48            |
|            | 0           | (1, 4) | 1.38                | 0.30            |

Fig. 5e, bottom

ANOVA: SMFs evoking different pPSTHs ~ **bird group** + stimulus species

| Comparison |                   | d.f.   | <i>F</i> -statistic | <i>P</i> -value      |
|------------|-------------------|--------|---------------------|----------------------|
| deep       | $z_{ZF} - z_{BF}$ | (1, 1) | 21.75               | $7.7 \times 10^{-6}$ |

Nested ANOVAs: spike rate ~ **bird group** + bird identity(group)

| Comparison |             | d.f.   | <i>F</i> -statistic | <i>P</i> -value |
|------------|-------------|--------|---------------------|-----------------|
| deep       | 1.8 cyc/kHz | (1, 4) | 3.74                | 0.11            |
|            | 1.6         | (1, 4) | 2.32                | 0.18            |
|            | 1.4         | (1, 4) | 0.28                | 0.62            |
|            | 1.2         | (1, 4) | 0.99                | 0.36            |
|            | 1.0         | (1, 4) | 1.53                | 0.27            |
|            | 0.8         | (1, 4) | 13.09               | 0.012           |
|            | 0.6         | (1, 4) | 18.90               | 0.0012          |
|            | 0.4         | (1, 4) | 0.03                | 0.88            |
|            | 0.2         | (1, 4) | 0.29                | 0.61            |
|            | 0           | (1, 4) | 6.44                | 0.039           |

Fig. 5f, *top*ANOVA: SMFs evoking different pPSTHs ~ **bird group** + stimulus species

| Comparison |                     | d.f.   | <i>F</i> -statistic | <i>P</i> -value |
|------------|---------------------|--------|---------------------|-----------------|
| int.       | $lf_{LF} - lf_{BF}$ | (1, 1) | 7.90                | 0.0054          |

Nested ANOVAs: spike rate ~ **bird group** + bird identity(group)

| Comparison |             | d.f.   | <i>F</i> -statistic | <i>P</i> -value |
|------------|-------------|--------|---------------------|-----------------|
| int.       | 1.8 cyc/kHz | (1, 4) | 0.82                | 0.42            |
|            | 1.6         | (1, 4) | 1.09                | 0.35            |
|            | 1.4         | (1, 4) | 1.52                | 0.28            |
|            | 1.2         | (1, 4) | 1.14                | 0.34            |
|            | 1.0         | (1, 4) | 0.39                | 0.57            |
|            | 0.8         | (1, 4) | 0.12                | 0.74            |
|            | 0.6         | (1, 4) | 0.16                | 0.71            |
|            | 0.4         | (1, 4) | 1.45                | 0.29            |
|            | 0.2         | (1, 4) | 0.64                | 0.47            |
|            | 0           | (1, 4) | 0.25                | 0.64            |

Fig. 5f, *bottom*ANOVA: SMFs evoking different pPSTHs ~ **bird group** + stimulus species

| Comparison |                     | d.f.   | <i>F</i> -statistic | <i>P</i> -value |
|------------|---------------------|--------|---------------------|-----------------|
| deep       | $lf_{LF} - lf_{BF}$ | (1, 1) | 10.70               | 0.0013          |

Nested ANOVAs: spike rate ~ **bird group** + bird identity(group)

| Comparison |             | d.f.   | <i>F</i> -statistic | <i>P</i> -value |
|------------|-------------|--------|---------------------|-----------------|
| deep       | 1.8 cyc/kHz | (1, 4) | 5.95                | 0.059           |
|            | 1.6         | (1, 4) | 5.88                | 0.056           |
|            | 1.4         | (1, 4) | 5.06                | 0.071           |
|            | 1.2         | (1, 4) | 4.32                | 0.080           |
|            | 1.0         | (1, 4) | 1.69                | 0.23            |
|            | 0.8         | (1, 4) | 2.78                | 0.15            |
|            | 0.6         | (1, 4) | 7.80                | 0.040           |
|            | 0.4         | (1, 4) | 11.27               | 0.018           |
|            | 0.2         | (1, 4) | 3.81                | 0.081           |
|            | 0           | (1, 4) | 2.59                | 0.14            |

Fig. 6a

Pearson correlations: two-sided  $P$ -values from randomized permutations

| Comparison                              | d.f. | $t$ -statistic | $r$   | $P$ -value |
|-----------------------------------------|------|----------------|-------|------------|
| zf <sub>ZF</sub> : ZF – LF              | 108  | -6.69          | -0.54 | <0.001     |
| lf <sub>LF</sub> : ZF – LF              | 108  | -1.18          | -0.11 | 0.27       |
| ZF: zf <sub>ZF</sub> – lf <sub>LF</sub> | 108  | 14.86          | 0.82  | <0.001     |
| LF: zf <sub>ZF</sub> – lf <sub>LF</sub> | 108  | 16.74          | 0.85  | <0.001     |

Fig. 6b

Pearson correlations: two-sided  $P$ -values from randomized permutations

| Comparison                              | d.f. | $t$ -statistic | $r$   | $P$ -value |
|-----------------------------------------|------|----------------|-------|------------|
| zf <sub>ZF</sub> : ZF – BF              | 108  | -10.12         | -0.70 | <0.001     |
| zf <sub>BF</sub> : ZF – BF              | 108  | -4.27          | -0.38 | <0.001     |
| ZF: zf <sub>ZF</sub> – zf <sub>BF</sub> | 108  | 24.90          | 0.92  | <0.001     |
| BF: zf <sub>ZF</sub> – zf <sub>BF</sub> | 108  | 3.86           | 0.35  | <0.001     |

Fig. 6c

Pearson correlations: two-sided  $P$ -values from randomized permutations

| Comparison                              | d.f. | $t$ -statistic | $r$   | $P$ -value |
|-----------------------------------------|------|----------------|-------|------------|
| lf <sub>LF</sub> : LF – BF              | 108  | -3.67          | -0.33 | <0.001     |
| lf <sub>BF</sub> : LF – BF              | 108  | -0.18          | -0.02 | 0.86       |
| LF: lf <sub>LF</sub> – lf <sub>BF</sub> | 108  | 12.59          | 0.77  | <0.001     |
| BF: lf <sub>LF</sub> – lf <sub>BF</sub> | 108  | 5.07           | 0.44  | <0.001     |



Fig. S1d, *top*Nested ANOVAs: syllable pitch ~ **bird group** + bird identity(group)

| Comparison                          | d.f.    | <i>F</i> -statistic | <i>P</i> -value      |
|-------------------------------------|---------|---------------------|----------------------|
| ZF – zf <sub>ZF</sub>               | (1, 28) | 0.42                | 0.52                 |
| zf <sub>ZF</sub> – zf <sub>BF</sub> | (1, 34) | 41.59               | $3.9 \times 10^{-7}$ |
| zf <sub>BF</sub> – BF               | (1, 14) | 2.00                | 0.18                 |
| BF – lf <sub>BF</sub>               | (1, 13) | 0.06                | 0.81                 |
| lf <sub>BF</sub> – lf <sub>LF</sub> | (1, 20) | 23.72               | $5.8 \times 10^{-5}$ |
| lf <sub>LF</sub> – LF               | (1, 16) | 0.07                | 0.79                 |

Fig. S1d, *bottom*Regression: pupil syllable pitch ~ **tutor syllable pitch (X<sub>1</sub>)** + tutor identity (X<sub>2</sub>)

| Comparison            | d.f. | <i>t</i> -statistic | partial <i>r</i> | <i>P</i> -value       |
|-----------------------|------|---------------------|------------------|-----------------------|
| ZF – zf <sub>ZF</sub> | 125  | 15.02               | 0.80             | $9.2 \times 10^{-30}$ |
| BF – zf <sub>BF</sub> | 92   | 18.96               | 0.89             | $1.6 \times 10^{-33}$ |
| BF – lf <sub>BF</sub> | 66   | 20.50               | 0.93             | $2.5 \times 10^{-30}$ |
| LF – lf <sub>LF</sub> | 46   | 40.69               | 0.99             | $1.0 \times 10^{-37}$ |

Fig. S1e, *top*Nested ANOVAs: syllable mean freq. ~ **bird group** + bird identity(group)

| Comparison                          | d.f.    | <i>F</i> -statistic | <i>P</i> -value |
|-------------------------------------|---------|---------------------|-----------------|
| ZF – zf <sub>ZF</sub>               | (1, 28) | 0.14                | 0.71            |
| zf <sub>ZF</sub> – zf <sub>BF</sub> | (1, 34) | 0.23                | 0.64            |
| zf <sub>BF</sub> – BF               | (1, 14) | 6.42                | 0.024           |
| BF – lf <sub>BF</sub>               | (1, 13) | 8.48                | 0.012           |
| lf <sub>BF</sub> – lf <sub>LF</sub> | (1, 20) | 2.63                | 0.12            |
| lf <sub>LF</sub> – LF               | (1, 16) | 0.64                | 0.43            |

Fig. S1e, *bottom*Regression: pupil syllable mean freq. ~ **tutor syllable mean freq. (X<sub>1</sub>)** + tutor identity (X<sub>2</sub>)

| Comparison            | d.f. | <i>t</i> -statistic | partial <i>r</i> | <i>P</i> -value       |
|-----------------------|------|---------------------|------------------|-----------------------|
| ZF – zf <sub>ZF</sub> | 125  | 15.47               | 0.81             | $8.0 \times 10^{-31}$ |
| BF – zf <sub>BF</sub> | 92   | 8.29                | 0.65             | $9.2 \times 10^{-13}$ |
| BF – lf <sub>BF</sub> | 66   | 4.05                | 0.45             | $1.4 \times 10^{-4}$  |
| LF – lf <sub>LF</sub> | 46   | 19.30               | 0.94             | $1.1 \times 10^{-23}$ |

Fig. S1f, *top*Nested ANOVAs: syllable FM ~ **bird group** + bird identity(group)

| Comparison                          | d.f.    | <i>F</i> -statistic | <i>P</i> -value |
|-------------------------------------|---------|---------------------|-----------------|
| ZF – zf <sub>ZF</sub>               | (1, 28) | 0.17                | 0.68            |
| zf <sub>ZF</sub> – zf <sub>BF</sub> | (1, 34) | 2.02                | 0.17            |
| zf <sub>BF</sub> – BF               | (1, 14) | 10.00               | 0.010           |
| BF – lf <sub>BF</sub>               | (1, 13) | 13.08               | 0.0035          |
| lf <sub>BF</sub> – lf <sub>LF</sub> | (1, 20) | 10.82               | 0.0029          |
| lf <sub>LF</sub> – LF               | (1, 16) | 0.09                | 0.77            |

Fig. S1f, *bottom*Regression: pupil syllable FM ~ **tutor syllable FM (X<sub>1</sub>)** + tutor identity (X<sub>2</sub>)

| Comparison            | d.f. | <i>t</i> -statistic | partial <i>r</i> | <i>P</i> -value         |
|-----------------------|------|---------------------|------------------|-------------------------|
| ZF – zf <sub>ZF</sub> | 125  | 30.82               | 0.94             | 3.0 × 10 <sup>-60</sup> |
| BF – zf <sub>BF</sub> | 92   | 14.04               | 0.83             | 1.3 × 10 <sup>-24</sup> |
| BF – lf <sub>BF</sub> | 66   | 10.51               | 0.79             | 1.0 × 10 <sup>-15</sup> |
| LF – lf <sub>LF</sub> | 46   | 14.35               | 0.90             | 1.3 × 10 <sup>-18</sup> |

Fig. S1g, *top*Nested ANOVAs: syllable entropy ~ **bird group** + bird identity(group)

| Comparison                          | d.f.    | <i>F</i> -statistic | <i>P</i> -value        |
|-------------------------------------|---------|---------------------|------------------------|
| ZF – zf <sub>ZF</sub>               | (1, 28) | 1.26                | 0.27                   |
| zf <sub>ZF</sub> – zf <sub>BF</sub> | (1, 34) | 4.72                | 0.038                  |
| zf <sub>BF</sub> – BF               | (1, 14) | 0.64                | 0.44                   |
| BF – lf <sub>BF</sub>               | (1, 13) | 16.16               | 0.0016                 |
| lf <sub>BF</sub> – lf <sub>LF</sub> | (1, 20) | 27.62               | 2.0 × 10 <sup>-5</sup> |
| lf <sub>LF</sub> – LF               | (1, 16) | 3.89                | 0.060                  |

Fig. S1g, *bottom*Regression: pupil syllable entropy ~ **tutor syllable entropy (X<sub>1</sub>)** + tutor identity (X<sub>2</sub>)

| Comparison            | d.f. | <i>t</i> -statistic | partial <i>r</i> | <i>P</i> -value         |
|-----------------------|------|---------------------|------------------|-------------------------|
| ZF – zf <sub>ZF</sub> | 125  | 15.48               | 0.81             | 7.5 × 10 <sup>-31</sup> |
| BF – zf <sub>BF</sub> | 92   | 12.41               | 0.79             | 2.4 × 10 <sup>-21</sup> |
| BF – lf <sub>BF</sub> | 66   | 6.97                | 0.65             | 1.8 × 10 <sup>-9</sup>  |
| LF – lf <sub>LF</sub> | 46   | 10.47               | 0.84             | 9.4 × 10 <sup>-14</sup> |

Fig. S4a

See Figs. 2d, 3a, 3c.

Fig. S5a-cRegression: selectivity (non-tutor syl. types) ~ **selectivity (all types) (X<sub>1</sub>)** + bird identity (X<sub>2</sub>)

| Comparison                 | d.f. | <i>t</i> -statistic | partial <i>r</i> | <i>P</i> -value           |
|----------------------------|------|---------------------|------------------|---------------------------|
| zf <sub>ZF</sub> (ZF – LF) | 822  | 208.74              | 0.99             | <4.2 × 10 <sup>-288</sup> |
| lf <sub>LF</sub> (ZF – LF) | 653  | 233.08              | 0.99             | <4.2 × 10 <sup>-288</sup> |
| zf <sub>ZF</sub> (ZF – BF) | 794  | 162.22              | 0.99             | <4.2 × 10 <sup>-288</sup> |
| zf <sub>BF</sub> (ZF – BF) | 543  | 134.89              | 0.99             | <4.2 × 10 <sup>-288</sup> |
| lf <sub>LF</sub> (LF – BF) | 640  | 190.81              | 0.99             | <4.2 × 10 <sup>-288</sup> |
| lf <sub>BF</sub> (LF – BF) | 417  | 96.92               | 0.98             | 4.2 × 10 <sup>-288</sup>  |

Fig. S5d

Repeated-measures ANOVAs: selectivity (all – non-tutor) ~ bird identity

| Comparison                 | d.f.     | <i>F</i> -statistic | <i>P</i> -value         |
|----------------------------|----------|---------------------|-------------------------|
| zf <sub>ZF</sub> : ZF – LF | (1, 823) | 128.69              | 8.2 × 10 <sup>-28</sup> |
| lf <sub>LF</sub> : ZF – LF | (1, 654) | 110.64              | 5.2 × 10 <sup>-24</sup> |
| zf <sub>ZF</sub> : ZF – BF | (1, 795) | 99.27               | 4.1 × 10 <sup>-22</sup> |
| zf <sub>BF</sub> : ZF – BF | (1, 544) | 53.90               | 7.7 × 10 <sup>-13</sup> |
| lf <sub>LF</sub> : LF – BF | (1, 641) | 98.32               | 1.2 × 10 <sup>-21</sup> |
| lf <sub>LF</sub> : LF – BF | (1, 418) | 18.83               | 1.8 × 10 <sup>-5</sup>  |

Fig. S6a

Repeated-measures ANOVAs: diff. in reliability (ZF – LF) ~ bird identity

| Comparison |                  | d.f.     | <i>F</i> -statistic | <i>P</i> -value       |
|------------|------------------|----------|---------------------|-----------------------|
| int.       | zf <sub>ZF</sub> | (1, 151) | 383.76              | $2.6 \times 10^{-43}$ |
|            | lf <sub>LF</sub> | (1, 173) | 291.90              | $5.6 \times 10^{-39}$ |
| sup.       | zf <sub>ZF</sub> | (1, 186) | 399.21              | $3.6 \times 10^{-48}$ |
|            | lf <sub>LF</sub> | (1, 53)  | 206.00              | $6.7 \times 10^{-20}$ |
| deep       | zf <sub>ZF</sub> | (1, 293) | 591.06              | $3.1 \times 10^{-72}$ |
|            | lf <sub>LF</sub> | (1, 241) | 242.35              | $2.7 \times 10^{-38}$ |
| sec.       | zf <sub>ZF</sub> | (1, 221) | 274.76              | $1.2 \times 10^{-40}$ |
|            | lf <sub>LF</sub> | (1, 209) | 130.94              | $7.4 \times 10^{-24}$ |

Nested ANOVAs: reliability ~ **bird group** + bird identity(group)

| Comparison |                                     | d.f.   | <i>F</i> -statistic | <i>P</i> -value |
|------------|-------------------------------------|--------|---------------------|-----------------|
| int.       | zf <sub>ZF</sub> – lf <sub>LF</sub> | (1, 4) | 10.55               | 0.030           |
| sup.       | zf <sub>ZF</sub> – lf <sub>LF</sub> | (1, 3) | 4.62                | 0.056           |
| deep       | zf <sub>ZF</sub> – lf <sub>LF</sub> | (1, 4) | 6.17                | 0.058           |
| sec.       | zf <sub>ZF</sub> – lf <sub>LF</sub> | (1, 4) | 2.58                | 0.17            |

Fig. S6b

Repeated-measures ANOVAs: diff. in reliability (ZF – BF) ~ bird identity

| Comparison |                  | d.f.     | <i>F</i> -statistic | <i>P</i> -value        |
|------------|------------------|----------|---------------------|------------------------|
| int.       | zf <sub>ZF</sub> | (1, 151) | 924.04              | $3.1 \times 10^{-66}$  |
|            | zf <sub>BF</sub> | (1, 72)  | 500.57              | $3.8 \times 10^{-34}$  |
| sup.       | zf <sub>ZF</sub> | (1, 186) | 1590.81             | $4.4 \times 10^{-93}$  |
|            | zf <sub>BF</sub> | (1, 82)  | 83.39               | $3.9 \times 10^{-14}$  |
| deep       | zf <sub>ZF</sub> | (1, 293) | 2179.92             | $9.7 \times 10^{-138}$ |
|            | zf <sub>BF</sub> | (1, 145) | 435.88              | $1.5 \times 10^{-45}$  |
| sec.       | zf <sub>ZF</sub> | (1, 221) | 1978.28             | $3.1 \times 10^{-112}$ |
|            | zf <sub>BF</sub> | (1, 265) | 420.05              | $1.4 \times 10^{-56}$  |

Nested ANOVAs: reliability ~ **bird group** + bird identity(group)

| Comparison |                                     | d.f.   | <i>F</i> -statistic | <i>P</i> -value |
|------------|-------------------------------------|--------|---------------------|-----------------|
| int.       | zf <sub>ZF</sub> – zf <sub>BF</sub> | (1, 4) | 0.25                | 0.63            |
| sup.       | zf <sub>ZF</sub> – zf <sub>BF</sub> | (1, 4) | 0.20                | 0.66            |
| deep       | zf <sub>ZF</sub> – zf <sub>BF</sub> | (1, 4) | 1.47                | 0.27            |
| sec.       | zf <sub>ZF</sub> – zf <sub>BF</sub> | (1, 4) | 1.29                | 0.29            |

Fig. S6c

Repeated-measures ANOVAs: diff. in reliability (LF – BF) ~ bird identity

| Comparison |                  | d.f.     | <i>F</i> -statistic | <i>P</i> -value       |
|------------|------------------|----------|---------------------|-----------------------|
| int.       | lf <sub>LF</sub> | (1, 173) | 143.60              | $1.8 \times 10^{-24}$ |
|            | lf <sub>BF</sub> | (1, 148) | 104.42              | $7.0 \times 10^{-19}$ |
| sup.       | lf <sub>LF</sub> | (1, 53)  | 117.16              | $4.9 \times 10^{-15}$ |
|            | lf <sub>BF</sub> | (1, 24)  | 13.93               | 0.0010                |
| deep       | lf <sub>LF</sub> | (1, 241) | 380.06              | $1.9 \times 10^{-51}$ |
|            | lf <sub>BF</sub> | (1, 87)  | 51.69               | $2.1 \times 10^{-10}$ |
| sec.       | lf <sub>LF</sub> | (1, 209) | 277.12              | $3.6 \times 10^{-40}$ |
|            | lf <sub>BF</sub> | (1, 211) | 275.62              | $3.8 \times 10^{-40}$ |

Nested ANOVAs: reliability ~ **bird group** + bird identity(group)

| Comparison |                                     | d.f.   | <i>F</i> -statistic | <i>P</i> -value |
|------------|-------------------------------------|--------|---------------------|-----------------|
| int.       | lf <sub>LF</sub> – lf <sub>BF</sub> | (1, 4) | 0.16                | 0.71            |
| sup.       | lf <sub>LF</sub> – lf <sub>BF</sub> | (1, 3) | 0.44                | 0.51            |
| deep       | lf <sub>LF</sub> – lf <sub>BF</sub> | (1, 4) | 12.29               | 0.0085          |
| sec.       | lf <sub>LF</sub> – lf <sub>BF</sub> | (1, 4) | 0.30                | 0.61            |

Fig. S7a

Repeated-measures ANOVAs: diff. in precision (ZF – LF) ~ bird identity

| Comparison |                  | d.f.     | <i>F</i> -statistic | <i>P</i> -value |
|------------|------------------|----------|---------------------|-----------------|
| int.       | zf <sub>ZF</sub> | (1, 147) | 0.23                | 0.64            |
|            | lf <sub>LF</sub> | (1, 154) | 0.00                | 0.99            |
| sup.       | zf <sub>ZF</sub> | (1, 173) | 0.02                | 0.88            |
|            | lf <sub>LF</sub> | (1, 47)  | 0.15                | 0.70            |
| deep       | zf <sub>ZF</sub> | (1, 265) | 0.04                | 0.85            |
|            | lf <sub>LF</sub> | (1, 200) | 3.23                | 0.074           |
| sec.       | zf <sub>ZF</sub> | (1, 191) | 0.55                | 0.46            |
|            | lf <sub>LF</sub> | (1, 128) | 2.25                | 0.14            |

Nested ANOVAs: precision ~ **bird group** + bird identity(group)

| Comparison |                                     | d.f.   | <i>F</i> -statistic | <i>P</i> -value |
|------------|-------------------------------------|--------|---------------------|-----------------|
| int.       | zf <sub>ZF</sub> – lf <sub>LF</sub> | (1, 4) | 0.32                | 0.60            |
| sup.       | zf <sub>ZF</sub> – lf <sub>LF</sub> | (1, 3) | 1.14                | 0.30            |
| deep       | zf <sub>ZF</sub> – lf <sub>LF</sub> | (1, 4) | 11.22               | 0.0045          |
| sec.       | zf <sub>ZF</sub> – lf <sub>LF</sub> | (1, 4) | 2.09                | 0.21            |

Fig. S7b

Repeated-measures ANOVAs: diff. in precision (ZF – BF) ~ bird identity

| Comparison |                  | d.f.     | <i>F</i> -statistic | <i>P</i> -value      |
|------------|------------------|----------|---------------------|----------------------|
| int.       | zf <sub>ZF</sub> | (1, 146) | 18.35               | $3.3 \times 10^{-5}$ |
|            | zf <sub>BF</sub> | (1, 66)  | 2.93                | 0.092                |
| sup.       | zf <sub>ZF</sub> | (1, 177) | 1.74                | 0.19                 |
|            | zf <sub>BF</sub> | (1, 76)  | 0.13                | 0.72                 |
| deep       | zf <sub>ZF</sub> | (1, 266) | 9.27                | 0.0026               |
|            | zf <sub>BF</sub> | (1, 129) | 5.55                | 0.020                |
| sec.       | zf <sub>ZF</sub> | (1, 188) | 24.97               | $1.3 \times 10^{-6}$ |
|            | zf <sub>BF</sub> | (1, 225) | 8.01                | 0.0051               |

Nested ANOVAs: precision ~ **bird group** + bird identity(group)

| Comparison |                                     | d.f.   | <i>F</i> -statistic | <i>P</i> -value |
|------------|-------------------------------------|--------|---------------------|-----------------|
| int.       | zf <sub>ZF</sub> – zf <sub>BF</sub> | (1, 4) | 0.74                | 0.42            |
| sup.       | zf <sub>ZF</sub> – zf <sub>BF</sub> | (1, 4) | 0.05                | 0.83            |
| deep       | zf <sub>ZF</sub> – zf <sub>BF</sub> | (1, 4) | 2.76                | 0.11            |
| sec.       | zf <sub>ZF</sub> – zf <sub>BF</sub> | (1, 4) | 0.43                | 0.52            |

Fig. S7c

Repeated-measures ANOVAs: diff. in precision (LF – BF) ~ bird identity

| Comparison |                  | d.f.     | <i>F</i> -statistic | <i>P</i> -value |
|------------|------------------|----------|---------------------|-----------------|
| int.       | lf <sub>LF</sub> | (1, 162) | 5.23                | 0.024           |
|            | lf <sub>BF</sub> | (1, 134) | 3.58                | 0.061           |
| sup.       | lf <sub>LF</sub> | (1, 48)  | 6.71                | 0.013           |
|            | lf <sub>BF</sub> | (1, 20)  | 0.93                | 0.35            |
| deep       | lf <sub>LF</sub> | (1, 213) | 0.15                | 0.69            |
|            | lf <sub>BF</sub> | (1, 69)  | 3.84                | 0.054           |
| sec.       | lf <sub>LF</sub> | (1, 184) | 0.60                | 0.44            |
|            | lf <sub>BF</sub> | (1, 178) | 4.66                | 0.032           |

Nested ANOVAs: precision ~ **bird group** + bird identity(group)

| Comparison |                                     | d.f.   | <i>F</i> -statistic | <i>P</i> -value |
|------------|-------------------------------------|--------|---------------------|-----------------|
| int.       | lf <sub>LF</sub> – lf <sub>BF</sub> | (1, 4) | 1.20                | 0.33            |
| sup.       | lf <sub>LF</sub> – lf <sub>BF</sub> | (1, 3) | 0.02                | 0.89            |
| deep       | lf <sub>LF</sub> – lf <sub>BF</sub> | (1, 4) | 0.75                | 0.42            |
| sec.       | lf <sub>LF</sub> – lf <sub>BF</sub> | (1, 4) | 1.42                | 0.29            |

Fig. S8a

Repeated-measures ANOVAs: diff in. discrimination (ZF – LF) ~ bird identity

| Comparison |                  | d.f.     | <i>F</i> -statistic | <i>P</i> -value      |
|------------|------------------|----------|---------------------|----------------------|
| int.       | zf <sub>ZF</sub> | (1, 110) | 31.76               | $1.4 \times 10^{-7}$ |
|            | lf <sub>LF</sub> | (1, 96)  | 4.87                | 0.030                |
| sup.       | zf <sub>ZF</sub> | (1, 108) | 10.21               | 0.0018               |
|            | lf <sub>LF</sub> | (1, 31)  | 0.81                | 0.38                 |
| deep       | zf <sub>ZF</sub> | (1, 183) | 26.06               | $8.3 \times 10^{-7}$ |
|            | lf <sub>LF</sub> | (1, 121) | 0.11                | 0.75                 |
| sec.       | zf <sub>ZF</sub> | (1, 137) | 11.40               | $9.5 \times 10^{-4}$ |
|            | lf <sub>LF</sub> | (1, 35)  | 16.56               | $2.6 \times 10^{-4}$ |

Nested ANOVAs: discrimination ~ **bird group** + bird identity(group)

| Comparison |                                     | d.f.   | <i>F</i> -statistic | <i>P</i> -value |
|------------|-------------------------------------|--------|---------------------|-----------------|
| int.       | zf <sub>ZF</sub> – lf <sub>LF</sub> | (1, 3) | 0.61                | 0.49            |
| sup.       | zf <sub>ZF</sub> – lf <sub>LF</sub> | (1, 3) | 1.70                | 0.27            |
| deep       | zf <sub>ZF</sub> – lf <sub>LF</sub> | (1, 3) | 22.50               | 0.016           |
| sec.       | zf <sub>ZF</sub> – lf <sub>LF</sub> | (1, 3) | 6.88                | 0.066           |

Fig. S8b

Repeated-measures ANOVAs: diff. in discrimination (ZF – BF) ~ bird identity

| Comparison |                  | d.f.     | <i>F</i> -statistic | <i>P</i> -value      |
|------------|------------------|----------|---------------------|----------------------|
| int.       | zf <sub>ZF</sub> | (1, 123) | 0.19                | 0.66                 |
|            | zf <sub>BF</sub> | (1, 36)  | 0.49                | 0.49                 |
| sup.       | zf <sub>ZF</sub> | (1, 114) | 1.43                | 0.23                 |
|            | zf <sub>BF</sub> | (1, 47)  | 0.17                | 0.68                 |
| deep       | zf <sub>ZF</sub> | (1, 199) | 15.92               | $9.3 \times 10^{-5}$ |
|            | zf <sub>BF</sub> | (1, 89)  | 0.10                | 0.75                 |
| sec.       | zf <sub>ZF</sub> | (1, 124) | 7.81                | 0.0060               |
|            | zf <sub>BF</sub> | (1, 157) | 0.010               | 0.93                 |

Nested ANOVAs: discrimination ~ **bird group** + bird identity(group)

| Comparison |                                     | d.f.   | <i>F</i> -statistic | <i>P</i> -value      |
|------------|-------------------------------------|--------|---------------------|----------------------|
| int.       | zf <sub>ZF</sub> – zf <sub>BF</sub> | (1, 3) | 0.21                | 0.66                 |
| sup.       | zf <sub>ZF</sub> – zf <sub>BF</sub> | (1, 3) | 0                   | 0.98                 |
| deep       | zf <sub>ZF</sub> – zf <sub>BF</sub> | (1, 3) | 21.10               | $4.8 \times 10^{-4}$ |
| sec.       | zf <sub>ZF</sub> – zf <sub>BF</sub> | (1, 3) | 2.08                | 0.19                 |



Fig. S8c

Repeated-measures ANOVAs: diff. in discrimination (LF – BF) ~ bird identity

| Comparison |                  | d.f.     | <i>F</i> -statistic | <i>P</i> -value      |
|------------|------------------|----------|---------------------|----------------------|
| int.       | lf <sub>LF</sub> | (1, 132) | 7.06                | 0.0089               |
|            | lf <sub>BF</sub> | (1, 92)  | 18.09               | $5.1 \times 10^{-5}$ |
| sup.       | lf <sub>LF</sub> | (1, 38)  | 0.050               | 0.83                 |
|            | lf <sub>BF</sub> | (1, 12)  | 4.15                | 0.064                |
| deep       | lf <sub>LF</sub> | (1, 150) | 0                   | 0.99                 |
|            | lf <sub>BF</sub> | (1, 39)  | 12.38               | 0.0011               |
| sec.       | lf <sub>LF</sub> | (1, 117) | 6.71                | 0.011                |
|            | lf <sub>BF</sub> | (1, 119) | 5.87                | 0.017                |

Nested ANOVAs: discrimination ~ **bird group** + bird identity(group)

| Comparison |                                     | d.f.   | <i>F</i> -statistic | <i>P</i> -value |
|------------|-------------------------------------|--------|---------------------|-----------------|
| int.       | lf <sub>LF</sub> – lf <sub>BF</sub> | (1, 4) | 0.80                | 0.42            |
| sup.       | lf <sub>LF</sub> – lf <sub>BF</sub> | (1, 3) | 4.33                | 0.066           |
| deep       | lf <sub>LF</sub> – lf <sub>BF</sub> | (1, 4) | 6.49                | 0.037           |
| sec.       | lf <sub>LF</sub> – lf <sub>BF</sub> | (1, 4) | 5.42                | 0.075           |

Fig. S8d

Regression: diff. in discrimination (ZF – LF) ~ **selectivity (X<sub>1</sub>)** + bird identity (X<sub>2</sub>)

| Comparison       |      | d.f. | <i>t</i> -statistic | partial <i>r</i> | <i>P</i> -value       |
|------------------|------|------|---------------------|------------------|-----------------------|
| zf <sub>ZF</sub> | int. | 109  | 2.74                | 0.25             | 0.0071                |
|                  | sup. | 107  | 4.89                | 0.43             | $3.6 \times 10^{-6}$  |
|                  | deep | 182  | 4.52                | 0.32             | $1.1 \times 10^{-5}$  |
|                  | sec. | 136  | 9.33                | 0.62             | $2.6 \times 10^{-16}$ |
| lf <sub>LF</sub> | int. | 94   | 8.90                | 0.68             | $4.2 \times 10^{-14}$ |
|                  | sup. | 30   | 1.21                | 0.22             | 0.24                  |
|                  | deep | 119  | 7.67                | 0.58             | $5.1 \times 10^{-12}$ |
|                  | sec. | 35   | 2.80                | 0.43             | 0.0082                |

Fig. S8e

Regression: diff. in discrimination (ZF – BF) ~ **selectivity (X<sub>1</sub>)** + bird identity (X<sub>2</sub>)

| Comparison       |      | d.f. | <i>t</i> -statistic | partial <i>r</i> | <i>P</i> -value       |
|------------------|------|------|---------------------|------------------|-----------------------|
| zf <sub>ZF</sub> | int. | 122  | 3.49                | 0.30             | $6.8 \times 10^{-4}$  |
|                  | sup. | 113  | 2.53                | 0.23             | 0.013                 |
|                  | deep | 198  | 6.93                | 0.44             | $5.8 \times 10^{-11}$ |
|                  | sec. | 123  | 6.32                | 0.50             | $4.3 \times 10^{-9}$  |
| zf <sub>BF</sub> | int. | 35   | 1.60                | 0.26             | 0.12                  |
|                  | sup. | 45   | 4.27                | 0.54             | $1.0 \times 10^{-4}$  |
|                  | deep | 87   | 4.88                | 0.46             | $4.8 \times 10^{-6}$  |
|                  | sec. | 156  | 6.37                | 0.45             | $2.0 \times 10^{-9}$  |

Fig. S8f

Regression: diff. in discrimination (LF – BF) ~ **selectivity (X<sub>1</sub>)** + bird identity (X<sub>2</sub>)

| Comparison       |      | d.f. | <i>t</i> -statistic | partial <i>r</i> | <i>P</i> -value       |
|------------------|------|------|---------------------|------------------|-----------------------|
| lf <sub>LF</sub> | int. | 131  | 7.21                | 0.53             | $3.9 \times 10^{-11}$ |
|                  | sup. | 37   | 3.88                | 0.54             | $4.2 \times 10^{-4}$  |
|                  | deep | 149  | 6.98                | 0.50             | $8.9 \times 10^{-11}$ |
|                  | sec. | 116  | 8.66                | 0.63             | $3.2 \times 10^{-14}$ |
| lf <sub>BF</sub> | int. | 91   | 7.36                | 0.61             | $7.8 \times 10^{-11}$ |
|                  | sup. | 11   | 0.79                | 0.23             | 0.44                  |
|                  | deep | 38   | 2.19                | 0.33             | 0.035                 |
|                  | sec. | 118  | 6.20                | 0.50             | $8.5 \times 10^{-9}$  |

Fig. S9a

Two-sided, paired *t*-tests: number of segments ( $z_{ZF} > z_{BF}$  vs.  $z_{BF} > z_{ZF}$ )

| Comparison |    | d.f. | <i>t</i> -statistic | <i>P</i> -value |
|------------|----|------|---------------------|-----------------|
| int.       | ZF | 4    | 1.49                | 0.21            |
|            | BF | 4    | -1.29               | 0.27            |

Fig. S9b

Two-sided, paired *t*-tests: number of segments ( $l_{LF} > l_{BF}$  vs.  $l_{BF} > l_{LF}$ )

| Comparison |    | d.f. | <i>t</i> -statistic | <i>P</i> -value |
|------------|----|------|---------------------|-----------------|
| int.       | LF | 4    | 5.93                | 0.0040          |
|            | BF | 4    | -1.38               | 0.24            |

Fig. S10a

Two-sided, paired *t*-tests: number of segments ( $z_{ZF} > z_{BF}$  vs.  $z_{BF} > z_{ZF}$ )

| Comparison |    | d.f. | <i>t</i> -statistic | <i>P</i> -value |
|------------|----|------|---------------------|-----------------|
| sup.       | ZF | 4    | 0.88                | 0.43            |
|            | BF | 4    | -2.27               | 0.086           |

Fig. S10b

Two-sided, paired *t*-tests: number of segments ( $l_{LF} > l_{BF}$  vs.  $l_{BF} > l_{LF}$ )

| Comparison |    | d.f. | <i>t</i> -statistic | <i>P</i> -value |
|------------|----|------|---------------------|-----------------|
| sup.       | LF | 4    | 2.95                | 0.042           |
|            | BF | 4    | -1.75               | 0.16            |

Fig. S11a

Two-sided, paired *t*-tests: number of segments ( $z_{ZF} > z_{BF}$  vs.  $z_{BF} > z_{ZF}$ )

| Comparison |    | d.f. | <i>t</i> -statistic | <i>P</i> -value |
|------------|----|------|---------------------|-----------------|
| sec.       | ZF | 4    | 1.19                | 0.30            |
|            | BF | 4    | -3.64               | 0.022           |

Fig. S11b

Two-sided, paired *t*-tests: number of segments ( $l_{LF} > l_{BF}$  vs.  $l_{BF} > l_{LF}$ )

| Comparison |    | d.f. | <i>t</i> -statistic | <i>P</i> -value |
|------------|----|------|---------------------|-----------------|
| sec.       | LF | 4    | 3.38                | 0.028           |
|            | BF | 4    | -3.29               | 0.030           |

Fig. S12c

1-way ANOVA, Tukey-Kramer *post hoc* tests

| Comparison |                                     | d.f.    | <i>F</i> -statistic | <i>P</i> -value       | <i>P</i> -value       |
|------------|-------------------------------------|---------|---------------------|-----------------------|-----------------------|
| int.       | zf <sub>ZF</sub> – zf <sub>BF</sub> | (2,129) | 36.09               | $3.6 \times 10^{-13}$ | 0.26                  |
|            | zf <sub>ZF</sub> – ×                |         |                     |                       | $9.6 \times 10^{-10}$ |
|            | zf <sub>BF</sub> – ×                |         |                     |                       | $1.3 \times 10^{-9}$  |
| sup.       | zf <sub>ZF</sub> – zf <sub>BF</sub> | (2,129) | 20.06               | $2.6 \times 10^{-8}$  | $7.6 \times 10^{-4}$  |
|            | zf <sub>ZF</sub> – ×                |         |                     |                       | $1.8 \times 10^{-9}$  |
|            | zf <sub>BF</sub> – ×                |         |                     |                       | 0.022                 |
| deep       | zf <sub>ZF</sub> – zf <sub>BF</sub> | (2,129) | 13.82               | $3.6 \times 10^{-6}$  | 0.79                  |
|            | zf <sub>ZF</sub> – ×                |         |                     |                       | $3.8 \times 10^{-6}$  |
|            | zf <sub>BF</sub> – ×                |         |                     |                       | $8.3 \times 10^{-5}$  |
| sec.       | zf <sub>ZF</sub> – zf <sub>BF</sub> | (2,129) | 9.65                | $1.2 \times 10^{-4}$  | 0.047                 |
|            | zf <sub>ZF</sub> – ×                |         |                     |                       | $3.4 \times 10^{-5}$  |
|            | zf <sub>BF</sub> – ×                |         |                     |                       | 0.11                  |

1-way ANOVA, Tukey-Kramer *post hoc* tests

| Comparison |                                     | d.f.    | <i>F</i> -statistic | <i>P</i> -value       | <i>P</i> -value       |
|------------|-------------------------------------|---------|---------------------|-----------------------|-----------------------|
| int.       | lf <sub>LF</sub> – lf <sub>BF</sub> | (2,114) | 21.89               | $9.0 \times 10^{-9}$  | 1                     |
|            | lf <sub>LF</sub> – ×                |         |                     |                       | $2.1 \times 10^{-7}$  |
|            | lf <sub>BF</sub> – ×                |         |                     |                       | $3.0 \times 10^{-7}$  |
| sup.       | lf <sub>LF</sub> – lf <sub>BF</sub> | (2,114) | 49.63               | $3.1 \times 10^{-16}$ | 0.48                  |
|            | lf <sub>LF</sub> – ×                |         |                     |                       | $9.6 \times 10^{-10}$ |
|            | lf <sub>BF</sub> – ×                |         |                     |                       | $9.6 \times 10^{-10}$ |
| deep       | lf <sub>LF</sub> – lf <sub>BF</sub> | (2,114) | 26.77               | $3.0 \times 10^{-10}$ | 1                     |
|            | lf <sub>LF</sub> – ×                |         |                     |                       | $1.4 \times 10^{-8}$  |
|            | lf <sub>BF</sub> – ×                |         |                     |                       | $1.7 \times 10^{-8}$  |
| sec.       | lf <sub>LF</sub> – lf <sub>BF</sub> | (2,114) | 13.55               | $5.3 \times 10^{-6}$  | 0.88                  |
|            | lf <sub>LF</sub> – ×                |         |                     |                       | $1.3 \times 10^{-4}$  |
|            | lf <sub>BF</sub> – ×                |         |                     |                       | $1.9 \times 10^{-5}$  |

\*Only data from the deep region are plotted in Fig. S10

Fig. S13c

Nested ANOVAs: best frequency ~ **bird group** + bird identity(group)

| Comparison                          | d.f.   | <i>F</i> -statistic | <i>P</i> -value |
|-------------------------------------|--------|---------------------|-----------------|
| zf <sub>ZF</sub> – lf <sub>LF</sub> | (1, 4) | 0.58                | 0.49            |
| zf <sub>ZF</sub> – zf <sub>BF</sub> | (1, 4) | 0.28                | 0.62            |
| lf <sub>LF</sub> – lf <sub>BF</sub> | (1, 4) | 1.55                | 0.28            |

Regression: spike rate selectivity ~ **best frequency (X<sub>1</sub>)** + bird identity (X<sub>2</sub>)

| Comparison                 | d.f. | <i>t</i> -statistic | partial <i>r</i> | <i>P</i> -value |
|----------------------------|------|---------------------|------------------|-----------------|
| zf <sub>ZF</sub> : ZF – LF | 774  | 0.01                | 0.00             | 0.99            |
| lf <sub>LF</sub> : ZF – LF | 593  | 0.13                | 0.01             | 0.90            |
| zf <sub>ZF</sub> : ZF – BF | 747  | 2.09                | 0.08             | 0.04            |
| zf <sub>BF</sub> : ZF – BF | 519  | 0.39                | 0.02             | 0.70            |
| lf <sub>LF</sub> : LF – BF | 585  | 1.06                | 0.04             | 0.29            |
| lf <sub>BF</sub> : LF – BF | 365  | -0.48               | -0.02            | 0.63            |

Fig. S13d

Nested ANOVAs: bandwidth ~ **bird group** + bird identity(group)

| Comparison                          | d.f.   | <i>F</i> -statistic | <i>P</i> -value |
|-------------------------------------|--------|---------------------|-----------------|
| zf <sub>ZF</sub> – lf <sub>LF</sub> | (1, 4) | 4.11                | 0.11            |
| zf <sub>ZF</sub> – zf <sub>BF</sub> | (1, 4) | 0.01                | 0.94            |
| lf <sub>LF</sub> – lf <sub>BF</sub> | (1, 4) | 0.73                | 0.44            |

Regression: spike rate selectivity ~ **bandwidth (X<sub>1</sub>)** + bird identity (X<sub>2</sub>)

| Comparison                 | d.f. | <i>t</i> -statistic | partial <i>r</i> | <i>P</i> -value      |
|----------------------------|------|---------------------|------------------|----------------------|
| zf <sub>ZF</sub> : ZF – LF | 774  | 5.89                | 0.21             | $5.7 \times 10^{-9}$ |
| lf <sub>LF</sub> : ZF – LF | 593  | 2.19                | 0.09             | 0.029                |
| zf <sub>ZF</sub> : ZF – BF | 747  | 1.24                | 0.05             | 0.22                 |
| zf <sub>BF</sub> : ZF – BF | 519  | -1.13               | -0.05            | 0.26                 |
| lf <sub>LF</sub> : LF – BF | 585  | -4.94               | -0.20            | $1.0 \times 10^{-6}$ |
| lf <sub>BF</sub> : LF – BF | 365  | -4.49               | -0.23            | $9.7 \times 10^{-6}$ |

Fig. S14d

---



---

Regression: spike rate selectivity ~ **song-tuning overlap (X<sub>1</sub>)** + bird identity (X<sub>2</sub>)

---

| Comparison                 | d.f. | <i>t</i> -statistic | partial <i>r</i> | <i>P</i> -value       |
|----------------------------|------|---------------------|------------------|-----------------------|
| zf <sub>ZF</sub> : ZF – LF | 731  | 12.91               | 0.43             | $1.7 \times 10^{-34}$ |
| lf <sub>LF</sub> : ZF – LF | 503  | 12.77               | 0.49             | $1.5 \times 10^{-32}$ |
| zf <sub>ZF</sub> : ZF – BF | 731  | 13.30               | 0.44             | $2.6 \times 10^{-36}$ |
| zf <sub>BF</sub> : ZF – BF | 493  | 19.46               | 0.66             | $5.1 \times 10^{-63}$ |
| lf <sub>LF</sub> : LF – BF | 503  | 12.91               | 0.50             | $3.9 \times 10^{-33}$ |
| lf <sub>BF</sub> : LF – BF | 361  | 7.92                | 0.38             | $3.1 \times 10^{-14}$ |
